# Supplementary material for: Protective Effects of Early Caffeine Administration in Hyperoxia-Induced Neurotoxicity in the Juvenile Rat
Source: MDPI journal article supplement (doi:10.3390/antiox12020295), 2023-01-28
Supplement: s1 [file s1]

**Table S1.** Quantitation of NeuroD1 and PCNA positive cells after oxygen-induced cerebral neurotoxicity with/without caffeine

| <b>hyperoxia</b>    | -        | +      | -       | +       | <b>hyperoxia</b>    | -        | +      | -       | +       |
|---------------------|----------|--------|---------|---------|---------------------|----------|--------|---------|---------|
| <b>caffeine</b>     | -        | -      | +       | +       | <b>caffeine</b>     | -        | -      | +       | +       |
| <b>P3</b>           |          |        |         |         | <b>P3_15</b>        |          |        |         |         |
| <b>NeuroD1/PCNA</b> | 100±4.7  | 69±3.6 | 100±4.1 | 107±7.4 | <b>NeuroD1/PCNA</b> | 100±12.2 | 62±3.7 | 54±5.3  | 82±2.7  |
| <b>PCNA</b>         | 100±2.3  | 71±7.9 | 85±9.4  | 108±5.2 | <b>PCNA</b>         | 100±8.9  | 59±4,8 | 50±6,9  | 81±7.8  |
| <b>P5</b>           |          |        |         |         | <b>P5_15</b>        |          |        |         |         |
| <b>NeuroD1/PCNA</b> | 100±12.4 | 26±4.9 | 95±5.4  | 155±8.8 | <b>NeuroD1/PCNA</b> | 100±13.1 | 64±9.3 | 101±8.2 | 145±6.8 |
| <b>PCNA</b>         | 100±8.9  | 34±3.2 | 77±8.1  | 122±7.9 | <b>PCNA</b>         | 100±6.9  | 33±2.7 | 41±4.2  | 65±5.9  |

Data are normalized to the level of rat pups exposed to normoxia at each time point (control 100 %,) and the 100 % values are 71.8 (P3), 84.1 (P3\_15), 85.6 (P5), and 52.9 (P5\_15) for NeuroD1/PCNA positive cells, or 157.9 (P3), 407.1 (P3\_15), 391.9 (P5), and 249.3 (P5\_15) for PCNA positive cells, respectively. Data expressed as % of control as mean ± SEM with *n* = 5–6/ group. The significant values can be obtained from the diagrams in Fig. 2.
