# Supplementary material for: Protective Effects of Early Caffeine Administration in Hyperoxia-Induced Neurotoxicity in the Juvenile Rat
Source: MDPI journal article supplement (doi:10.3390/antiox12020295), 2023-01-28
Supplement: s1 [file s1]

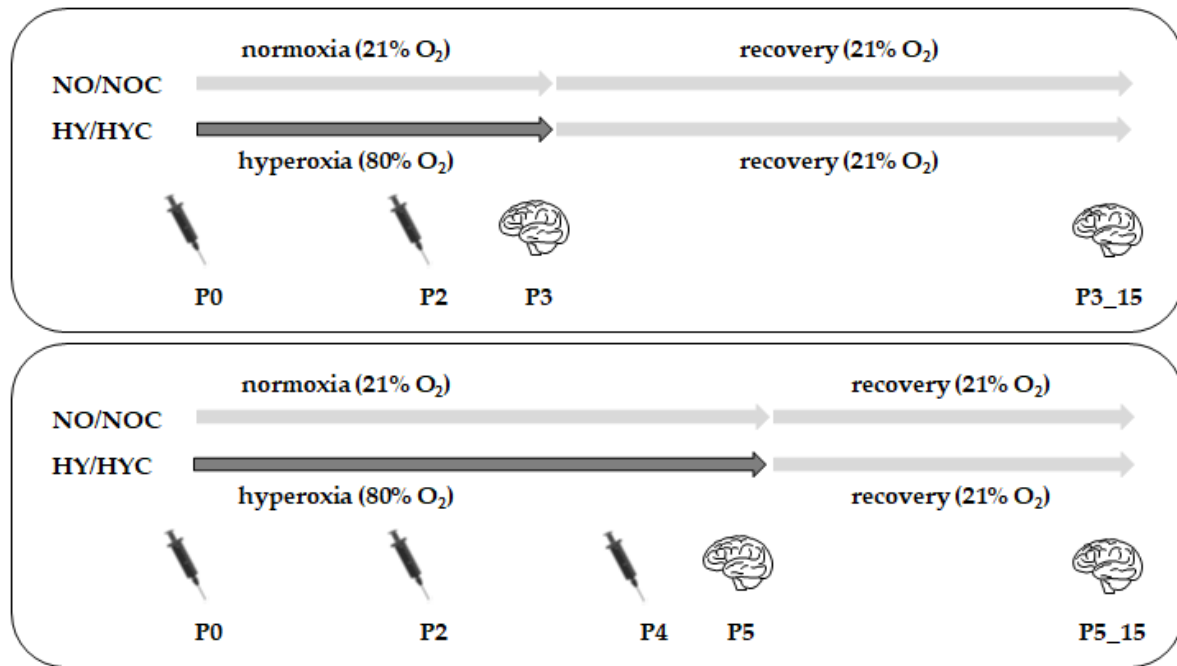

**Figure S1.** Experimental design. Oxygen exposure was performed in parallel with 21% or 80% oxygen from postnatal day (P)0 to P3 ( $n=6-8$ ) or P0 to P5 ( $n=6-8$ ). Keeping the same exposure times, rats were further divided into four groups: i) normoxic (NO, control group): 21% oxygen with vehicle (phosphate-buffered saline, PBS), ii) normoxia with caffeine (NOC): 21% oxygen with caffeine (10 mg/kg), iii) hyperoxia (HY): 80% oxygen with vehicle (PBS), and iv) hyperoxia with caffeine (HYC): 80% oxygen with caffeine (10 mg/kg). Applications were intraperitoneally (i.p.) injected as a fixed fraction of their body weight (100  $\mu$ l/10 g) every 48 hours starting from day of birth (P0). The administration of caffeine or vehicle took place for the pups with a total of three postnatal days of oxygen exposure (P0–P3) on the day of birth (P0) and on P2; for the rat pups with a total of five days of postnatal oxygen exposure (P0–P5) on the day of birth (P0) and on P2 and P4. Rat pups were examined after exposure to oxygen (P3, P5) directly or after recovery in room air at P15 (P3\_15, P5\_15).
