# Supplementary material for: Protective Effects of Early Caffeine Administration in Hyperoxia-Induced Neurotoxicity in the Juvenile Rat
Source: MDPI journal article supplement (doi:10.3390/antiox12020295), 2023-01-28
Supplement: s1 [file s1]

**Table S5.** Quantitation of mature granular neuron-associated mRNA expression after oxygen-induced cerebral neurotoxicity with/without caffeine

| <b>hyperoxia</b> | –       | +      | –      | +        | <b>hyperoxia</b> | –       | +       | –      | +       |
|------------------|---------|--------|--------|----------|------------------|---------|---------|--------|---------|
| <b>caffeine</b>  | –       | –      | +      | +        | <b>caffeine</b>  | –       | –       | +      | +       |
| <b>P3</b>        |         |        |        |          | <b>P3_15</b>     |         |         |        |         |
| <i>NeuroD2</i>   | 100±5.9 | 52±2.1 | 62±7.2 | 72±4.7   | <i>NeuroD2</i>   | 100±6.2 | 70±2.7  | 62±2.9 | 79±6.9  |
| <i>Prox1</i>     | 100±4.5 | 69±5.6 | 70±7.3 | 145±14.8 | <i>Prox1</i>     | 100±6.0 | 106±8.2 | 51±4.9 | 61±5.9  |
| <i>Tbr1</i>      | 100±6.8 | 71±1.8 | 79±1.5 | 99±7.1   | <i>Tbr1</i>      | 100±5.6 | 125±4.8 | 82±7.3 | 94±4.5  |
| <b>P5</b>        |         |        |        |          | <b>P5_15</b>     |         |         |        |         |
| <i>NeuroD2</i>   | 100±7.3 | 60±8.2 | 72±9.1 | 130±10.3 | <i>NeuroD2</i>   | 100±6.8 | 98±6.5  | 69±7.2 | 71±7.0  |
| <i>Prox1</i>     | 100±5.4 | 59±4.9 | 98±8.3 | 171±17.9 | <i>Prox1</i>     | 100±5.4 | 144±5.7 | 75±8.3 | 68±6.2  |
| <i>Tbr1</i>      | 100±9.7 | 55±8.4 | 61±9.0 | 103±9.3  | <i>Tbr1</i>      | 100±5.8 | 71±3.6  | 79±4.7 | 114±3.9 |

Data are normalized to the level of rat pups exposed to normoxia at each time point (control 100 %). Data expressed as % of control as mean ± SEM with *n* = 7–8/ group. The significant values can be obtained from the diagrams in Fig. 6.
