# Supplementary material for: Protective Effects of Early Caffeine Administration in Hyperoxia-Induced Neurotoxicity in the Juvenile Rat
Source: MDPI journal article supplement (doi:10.3390/antiox12020295), 2023-01-28
Supplement: s1 [file s1]

**Table S3.** Quantitation of neural progenitor-associated mRNA expression after oxygen-induced cerebral neurotoxicity with/without caffeine

| <b>hyperoxia</b> | –       | +       | –        | +        | <b>hyperoxia</b> | –       | +       | –       | +        |
|------------------|---------|---------|----------|----------|------------------|---------|---------|---------|----------|
| <b>caffeine</b>  | –       | –       | +        | +        | <b>caffeine</b>  | –       | –       | +       | +        |
| <b>P3</b>        |         |         |          |          | <b>P3_15</b>     |         |         |         |          |
| <i>Scl1a3</i>    | 100±6.7 | 103±5.7 | 90±7.6   | 113±6.0  | <i>Scl1a3</i>    | 100±3.7 | 141±7.6 | 102±3.7 | 101±6.3  |
| <i>GFAP</i>      | 100±5.6 | 111±5.7 | 96±8.9   | 88±8.1   | <i>GFAP</i>      | 100±3.7 | 100±4.8 | 94±4.9  | 95±2.5   |
| <i>Hes5</i>      | 100±6.2 | 105±8.2 | 85±4.1   | 86±5.5   | <i>Hes5</i>      | 100±6.9 | 133±5.6 | 92±5.9  | 80±4.9   |
| <i>Pax6</i>      | 100±6.5 | 68±4.8  | 60±4.2   | 53±3.1   | <i>Pax6</i>      | 100±8.2 | 132±8.8 | 99±5.0  | 96±6.6   |
| <i>Sox2</i>      | 100±7.0 | 96±9.3  | 50±6.6   | 22±2.8   | <i>Sox2</i>      | 100±4.3 | 120±7.5 | 86±4.9  | 30±3.9   |
| <b>P5</b>        |         |         |          |          | <b>P5_15</b>     |         |         |         |          |
| <i>Scl1a3</i>    | 100±7.3 | 59±5.4  | 80±6.9   | 140±7.6  | <i>Scl1a3</i>    | 100±4.2 | 77±3.2  | 82±6.3  | 74±7.0   |
| <i>GFAP</i>      | 100±5.8 | 95±2.3  | 49±4.5   | 111±12.9 | <i>GFAP</i>      | 100±7.5 | 103±2.2 | 91±7.3  | 96±7.1   |
| <i>Hes5</i>      | 100±3.2 | 68±2.5  | 85±5.3   | 140±13.1 | <i>Hes5</i>      | 100±5.1 | 58±2.9  | 95±5.3  | 94±8.9   |
| <i>Pax6</i>      | 100±5.9 | 79±6.7  | 160±10.3 | 158±7.0  | <i>Pax6</i>      | 100±3.6 | 103±2.8 | 107±6.4 | 159±11.1 |
| <i>Sox2</i>      | 100±8.1 | 60±5.7  | 67±7.5   | 105±4.4  | <i>Sox2</i>      | 100±3.7 | 93±3.2  | 94±8.2  | 104±8.5  |

Data are normalized to the level of rat pups exposed to normoxia at each time point (control 100 %). Data expressed as % of control as mean ± SEM with *n* = 7–8/ group. The significant values can be obtained from the diagrams in Fig. 4.
