# Supplementary material for: Protective Effects of Early Caffeine Administration in Hyperoxia-Induced Neurotoxicity in the Juvenile Rat
Source: MDPI journal article supplement (doi:10.3390/antiox12020295), 2023-01-28
Supplement: s1 [file s1]

**Table S6.** Quantitation of neurotrophin-associated mRNA expression after oxygen-induced cerebral neurotoxicity with/without caffeine

| <b>hyperoxia</b> | –       | +      | –       | +        | <b>hyperoxia</b> | –       | +       | –       | +       |
|------------------|---------|--------|---------|----------|------------------|---------|---------|---------|---------|
| <b>caffeine</b>  | –       | –      | +       | +        | <b>caffeine</b>  | –       | –       | +       | +       |
| <b>P3</b>        |         |        |         |          | <b>P3_15</b>     |         |         |         |         |
| <i>BDNF</i>      | 100±6.3 | 60±1.7 | 97±10.8 | 146±12.9 | <i>BDNF</i>      | 100±4.0 | 131±6.9 | 82±3.8  | 69±1.9  |
| <i>NGF</i>       | 100±4.7 | 72±3.5 | 107±6.9 | 104±5.1  | <i>NGF</i>       | 100±5.6 | 139±5.9 | 84±4.9  | 81±3.6  |
| <i>NT3</i>       | 100±6.7 | 58±5.4 | 93±8.2  | 188±23.7 | <i>NT3</i>       | 100±6.8 | 162±8.0 | 71±3.2  | 72±4.9  |
| <b>P5</b>        |         |        |         |          | <b>P5_15</b>     |         |         |         |         |
| <i>BDNF</i>      | 100±7.7 | 53±4.5 | 106±6.3 | 144±13.6 | <i>BDNF</i>      | 100±4.9 | 128±3.4 | 117±9.9 | 83±9.8  |
| <i>NGF</i>       | 100±6.2 | 98±6.3 | 94±5.0  | 159±8.1  | <i>NGF</i>       | 100±8.9 | 103±7.8 | 66±6.4  | 108±6.5 |
| <i>NT3</i>       | 100±6.9 | 66±6.4 | 59±3.0  | 130±15.2 | <i>NT3</i>       | 100±7.4 | 163±6.9 | 61±6.2  | 79±7.4  |

Data are normalized to the level of rat pups exposed to normoxia at each time point (control 100 %). Data expressed as % of control as mean ± SEM with *n* = 7–8/ group. The significant values can be obtained from the diagrams in Fig. 7.
