# Supplementary material for: Protective Effects of Early Caffeine Administration in Hyperoxia-Induced Neurotoxicity in the Juvenile Rat
Source: MDPI journal article supplement (doi:10.3390/antiox12020295), 2023-01-28
Supplement: s1 [file s1]

**Table S2.** Quantitation of NeuN positive cells after oxygen-induced cerebral neurotoxicity with/without caffeine

|                  |         |        |         |         |                  |         |         |         |         |
|------------------|---------|--------|---------|---------|------------------|---------|---------|---------|---------|
| <b>hyperoxia</b> | –       | +      | –       | +       | <b>hyperoxia</b> | –       | +       | –       | +       |
| <b>caffeine</b>  | –       | –      | +       | +       | <b>caffeine</b>  | –       | –       | +       | +       |
| <b>P3</b>        |         |        |         |         | <b>P3_15</b>     |         |         |         |         |
| <b>NeuN</b>      | 100±5.2 | 77±4.9 | 95±10.3 | 109±4.2 | <b>NeuN</b>      | 100±5.2 | 77±4.9  | 95±10.3 | 109±4.2 |
| <b>DAPI</b>      | 100±2.0 | 95±3.7 | 101±5.4 | 108±2.2 | <b>DAPI</b>      | 100±2.1 | 95±1.2  | 94±1.9  | 100±2.8 |
| <b>P5</b>        |         |        |         |         | <b>P5_15</b>     |         |         |         |         |
| <b>NeuN</b>      | 100±5.2 | 77±4.9 | 95±10.3 | 109±4.2 | <b>NeuN</b>      | 100±5.2 | 77±4.9  | 95±10.3 | 109±4.2 |
| <b>DAPI</b>      | 100±3.3 | 99±2.2 | 97±1.7  | 98±1.0  | <b>DAPI</b>      | 100±4.6 | 103±3.7 | 101±2.7 | 96±3.4  |

Data are normalized to the level of rat pups exposed to normoxia at each time point (control 100 %) and the 100 % values are 511.1 (P3), 480.7 (P3\_P15), 590.1 (P5), and 461.4 (P5\_P15) for NeuN positive cells, or 979.7 (P3), 1090.7 (P3\_15), 1050.1 (P5), and 1070.7 (P5\_15) for DAPI positive cells, respectively. Data expressed as % of control as mean ± SEM with *n* = 5–6/ group. The significant values can be obtained from the diagrams in Fig. 3 (NeuN) and Fig. S–2 (DAPI).
