# Supplementary material for: Protective Effects of Early Caffeine Administration in Hyperoxia-Induced Neurotoxicity in the Juvenile Rat
Source: MDPI journal article supplement (doi:10.3390/antiox12020295), 2023-01-28
Supplement: s1 [file s1]

**Table S4.** Quantitation of intermediate neuronal progenitor–cell–associated mRNA expression after oxygen–induced cerebral neurotoxicity with/without caffeine

| <b>hyperoxia</b> | –       | +        | –        | +        | <b>hyperoxia</b> | –       | +        | –       | +       |
|------------------|---------|----------|----------|----------|------------------|---------|----------|---------|---------|
| <b>caffeine</b>  | –       | –        | +        | +        | <b>caffeine</b>  | –       | –        | +       | +       |
| <b>P3</b>        |         |          |          |          | <b>P3_15</b>     |         |          |         |         |
| <i>Ascl1</i>     | 100±5.4 | 70±3.0   | 45±4.7   | 66±4.4   | <i>Ascl1</i>     | 100±7.5 | 145±7.6  | 60±2.6  | 69±4.2  |
| <i>Ngn2</i>      | 100±5.6 | 58±4.9   | 61±5.7   | 81±6.3   | <i>Ngn2</i>      | 100±5.8 | 69±4.9   | 53±4.2  | 92±6.3  |
| <i>Tbr2</i>      | 100±8.9 | 72±7.4   | 53±6.0   | 44±7.8   | <i>Tbr2</i>      | 100±8.8 | 55±3.5   | 96±12.7 | 87±10.3 |
| <i>NeuroD1</i>   | 100±6.6 | 62±6.1   | 103±12.9 | 120±11.4 | <i>NeuroD1</i>   | 100±5.9 | 133±8.7  | 55±2.6  | 57±1.9  |
| <i>CycD2</i>     | 100±7.4 | 66±5.1   | 95±6.7   | 125±7.9  | <i>CycD2</i>     | 100±5.2 | 99±5.1   | 101±8.1 | 134±5.1 |
| <b>P5</b>        |         |          |          |          | <b>P5_15</b>     |         |          |         |         |
| <i>Ascl1</i>     | 100±3.9 | 69±6.5   | 76±7.6   | 105±9.6  | <i>Ascl1</i>     | 100±6.9 | 92±5.2   | 65±4.2  | 80±7.2  |
| <i>Ngn2</i>      | 100±8.7 | 120±19.0 | 95±11.8  | 93±11.2  | <i>Ngn2</i>      | 100±8.9 | 156±14.9 | 59±8.6  | 67±12.5 |
| <i>Tbr2</i>      | 100±4.9 | 67±7.9   | 74±8.1   | 152±14.8 | <i>Tbr2</i>      | 100±9.5 | 73±6.2   | 63±8.1  | 95±10.2 |
| <i>NeuroD1</i>   | 100±7.9 | 71±11.2  | 59±6.5   | 125±16.1 | <i>NeuroD1</i>   | 100±4.8 | 131±3.9  | 93±6.5  | 77±4.8  |
| <i>CycD2</i>     | 100±3.7 | 65±1.9   | 90±13.0  | 119±8.6  | <i>CycD2</i>     | 100±5.8 | 70±2.7   | 69±6.4  | 92±6.2  |

Data are normalized to the level of rat pups exposed to normoxia at each time point (control 100 %). Data expressed as % of control as mean ± SEM with *n* = 7–8/ group. The significant values can be obtained from the diagrams in Fig. 5.
