# Supplementary material for: Protective Effects of Early Caffeine Administration in Hyperoxia-Induced Neurotoxicity in the Juvenile Rat
Source: Antioxidants (Basel). 2023 Jan 28;12(2):295. doi: 10.3390/antiox12020295 (PMC9952771; doi:10.3390/antiox12020295)
Supplement: Supplementary file 1 [file antioxidants-12-00295-s001.zip]

Archive with 8 entries (8 files):
- Fig S-1 Legend to Experimental design.pdf
- Fig S-2 Legend to Quantification of DAPI counts.pdf
- Tab S-1 Quantitation of NeuroD1 and PCNA Counts.pdf
- Tab S-2 Quantitation of NeuN Counts.pdf
- Tab S-3 Quantitation of Neural Progenitor-associated mRNA Expression.pdf
- Tab S-4 Quantitation of Intermediate Neuronal Progenitor-Cell-associated mRNA Expression.pdf
- Tab S-5 Quantitation of Mature Granular Neuron-associated mRNA Expression .pdf
- Tab S-6 Quantitation of Neurotrophin-associated mRNA Expression.pdf
